# Supplementary material
Source: publisher figshare collection journal article supplement (https://tandf.figshare.com/ndownloader/files/20098751)
Supplement: Supplementary file 1 [file 20098751]

## Supplementary appendix: figures and tables

Map SA.1. Distribution of treatment and control neighbourhoods across Carchi and Sucumbíos

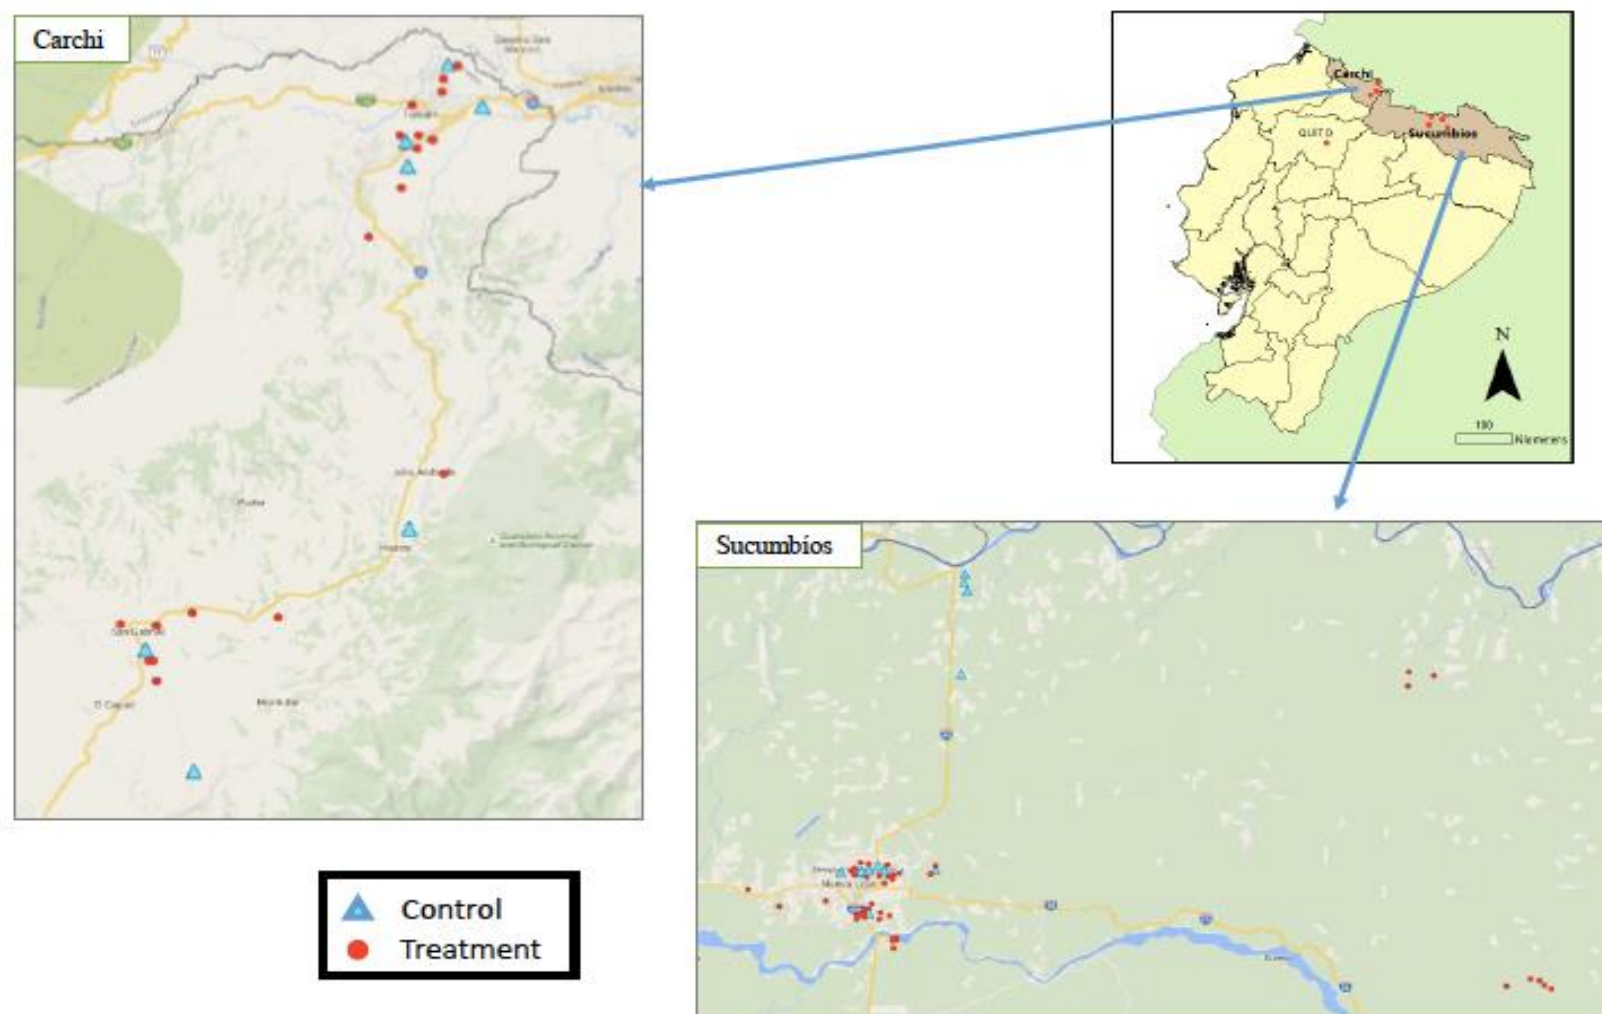

Table SA.1. Individual-level attrition (from baseline to end line) by treatment status

|                | N     | All  | Control | Treatment | p-value of diff. |
|----------------|-------|------|---------|-----------|------------------|
| Attrition rate | 2,357 | 0.20 | 0.23    | 0.19      | 0.19             |

*Note:* p-value obtained from Wald test on the equality of means of Treatment and Comparison attrition rate. Standard errors clustered at the cluster level.

\*  $p < .1$  \*\*  $p < .05$  \*\*\*  $p < .01$

Table SA.2. Testing individual differential attrition (from baseline to end line), by baseline characteristics and outcomes

|                                               | Control   |               |         | Treatment |               |         | Difference    |         |
|-----------------------------------------------|-----------|---------------|---------|-----------|---------------|---------|---------------|---------|
|                                               | Attritors | Non-attritors | p-value | Attritors | Non-attritors | p-value | Col(1)-Col(4) | p-value |
|                                               | (1)       | (2)           | (3)     | (4)       | (5)           | (6)     | (7)           | (8)     |
| Colombian                                     | 0.48      | 0.42          | 0.35    | 0.44      | 0.31          | 0.00    | 0.03          | 0.70    |
| Colombian: economic motivation for migration  | 0.17      | 0.10          | 0.10    | 0.15      | 0.09          | 0.01    | 0.02          | 0.63    |
| Colombian: political motivation for migration | 0.16      | 0.10          | 0.09    | 0.16      | 0.09          | 0.00    | 0.00          | 0.94    |
| Colombian: personal motivation for migration  | 0.07      | 0.06          | 0.69    | 0.09      | 0.05          | 0.06    | -0.01         | 0.69    |
| Colombian: resided in urban centre > 20 years | 0.07      | 0.16          | 0.00    | 0.05      | 0.07          | 0.12    | 0.02          | 0.43    |
| Secondary education or higher                 | 0.44      | 0.33          | 0.06    | 0.45      | 0.38          | 0.01    | -0.02         | 0.76    |
| Age (years)                                   | 37.60     | 39.27         | 0.32    | 35.62     | 38.91         | 0.00    | 1.98          | 0.22    |
| Female                                        | 0.71      | 0.80          | 0.06    | 0.70      | 0.81          | 0.00    | 0.00          | 0.96    |
| Married                                       | 0.23      | 0.27          | 0.44    | 0.27      | 0.26          | 0.90    | -0.04         | 0.45    |
| Household size                                | 4.11      | 3.92          | 0.33    | 3.80      | 3.69          | 0.30    | 0.31          | 0.09    |
| Number of children aged 0–5 years             | 0.62      | 0.56          | 0.40    | 0.63      | 0.61          | 0.78    | -0.01         | 0.92    |
| Number of children aged 6–15 years            | 0.96      | 0.99          | 0.75    | 0.82      | 0.86          | 0.55    | 0.14          | 0.18    |
| Wealth index: 2nd quintile                    | 0.23      | 0.14          | 0.00    | 0.23      | 0.21          | 0.42    | -0.00         | 0.99    |
| Wealth index: 3rd quintile                    | 0.18      | 0.22          | 0.45    | 0.14      | 0.21          | 0.01    | 0.04          | 0.34    |
| Wealth index: 4th quintile                    | 0.16      | 0.20          | 0.32    | 0.17      | 0.21          | 0.14    | -0.01         | 0.73    |
| Wealth index: 5th quintile                    | 0.26      | 0.26          | 0.98    | 0.16      | 0.18          | 0.47    | 0.10          | 0.12    |
| Resident in urban centre ≤ 20 years           | 0.60      | 0.40          | 0.00    | 0.56      | 0.40          | 0.00    | 0.04          | 0.57    |
| Carchi Province                               | 1.63      | 1.67          | 0.58    | 1.59      | 1.60          | 0.86    | 0.05          | 0.69    |

|                               |       |       |      |       |       |      |       |      |
|-------------------------------|-------|-------|------|-------|-------|------|-------|------|
| Trust in individuals          | 0.06  | -0.02 | 0.38 | -0.09 | -0.06 | 0.65 | 0.15  | 0.13 |
| Agency                        | -0.01 | 0.00  | 0.91 | 0.01  | 0.07  | 0.37 | -0.02 | 0.85 |
| Attitudes accepting diversity | -0.00 | 0.00  | 0.96 | 0.07  | 0.06  | 0.87 | -0.07 | 0.57 |
| Lack of discrimination        | -0.14 | 0.04  | 0.08 | -0.31 | -0.10 | 0.06 | 0.17  | 0.22 |
| Confidence in institutions    | -0.16 | 0.05  | 0.04 | -0.19 | 0.08  | 0.00 | 0.03  | 0.83 |
| Social participation          | -0.11 | 0.03  | 0.14 | -0.15 | -0.10 | 0.44 | 0.04  | 0.70 |
| Social cohesion               | -0.13 | 0.04  | 0.09 | -0.26 | -0.04 | 0.00 | 0.13  | 0.30 |
| <i>N</i>                      | 147   | 505   |      | 332   | 1,373 |      |       |      |

---

*Note:* p-values are reported from Wald tests on the equality of means of Treatment and Control for each variable. Standard errors clustered at the cluster level.

\*  $p < .1$  \*\*  $p < .05$  \*\*\*  $p < .01$

Table SA.3: Correlations, baseline and follow-up: aggregate outcomes

|                               | PCA   | Standardised<br>index |
|-------------------------------|-------|-----------------------|
| Trust in individuals          | 0.249 | 0.217                 |
| Agency                        | 0.077 | 0.110                 |
| Attitudes accepting diversity | 0.065 | 0.064                 |
| Lack of discrimination        | 0.263 | 0.245                 |
| Confidence in institutions    | 0.182 | 0.170                 |
| Social participation          | 0.238 | 0.236                 |
| Social cohesion               | 0.295 | 0.296                 |

Note: Correlation is calculated on the analysis sample (N = 1,878). PCA = principal component analysis.

Table SA.4. Scale reliability coefficient for principal component analysis measures: Alpha

|                               | Baseline | Follow-up |
|-------------------------------|----------|-----------|
| Trust in individuals          | 0.548    | 0.580     |
| Agency                        | 0.594    | 0.617     |
| Attitudes accepting diversity | 0.140    | 0.306     |
| Lack of discrimination        | 0.745    | 0.777     |
| Confidence in institutions    | 0.483    | 0.568     |
| Social Participation          | 0.344    | 0.361     |
| Social cohesion               | 0.674    | 0.751     |

*Note:* Tests of scale reliability are performed separately for baseline and follow-up and performed on the analysis sample (N = 1,878).

Table SA.5. ANCOVA models of impact of transfers on measures of social cohesion (principal component analysis)

|                              | Trust in individuals |                 | Agency          |                    | Attitudes accepting diversity |                 | Lack of discrimination |                 | Confidence in institutions |                   | Social participation |                  | Social cohesion  |                  |
|------------------------------|----------------------|-----------------|-----------------|--------------------|-------------------------------|-----------------|------------------------|-----------------|----------------------------|-------------------|----------------------|------------------|------------------|------------------|
|                              | (1)                  | (2)             | (3)             | (4)                | (5)                           | (6)             | (7)                    | (8)             | (9)                        | (10)              | (11)                 | (12)             | (13)             | (14)             |
| Pooled treatment             | 0.01<br>(0.07)       | 0.02<br>(0.09)  | 0.18<br>(0.10)* | -0.02<br>(0.06)    | 0.01<br>(0.08)                | -0.06<br>(0.08) | 0.07<br>(0.07)         | 0.08<br>(0.10)  | 0.18<br>(0.09)**           | 0.08<br>(0.08)    | 0.05<br>(0.05)       | -0.01<br>(0.07)  | 0.21<br>(0.11)** | 0.10<br>(0.10)   |
| Colombian                    | -0.01<br>(0.08)      | 0.02<br>(0.13)  | -0.06<br>(0.07) | -0.42<br>(0.16)*** | 0.04<br>(0.06)                | -0.09<br>(0.15) | -0.15<br>(0.07)**      | -0.14<br>(0.14) | -0.15<br>(0.08)*           | -0.32<br>(0.15)** | 0.00<br>(0.04)       | -0.10<br>(0.06)  | -0.15<br>(0.09)* | -0.35<br>(0.20)* |
| Pooled treatment X Colombian |                      | -0.05<br>(0.15) |                 | 0.51<br>(0.17)***  |                               | 0.18<br>(0.15)  |                        | -0.02<br>(0.14) |                            | 0.24<br>(0.17)    |                      | 0.15<br>(0.08)*  |                  | 0.29<br>(0.21)   |
| $R^2$                        | 0.08                 | 0.08            | 0.04            | 0.06               | 0.02                          | 0.02            | 0.10                   | 0.10            | 0.08                       | 0.08              | 0.07                 | 0.08             | 0.11             | 0.12             |
| $N$                          | 1,878                | 1,878           | 1,878           | 1,878              | 1,878                         | 1,878           | 1,878                  | 1,878           | 1,878                      | 1,878             | 1,878                | 1,878            | 1,878            | 1,878            |
| Net treatment Colombian      |                      | -0.02<br>(0.12) |                 | 0.50<br>(0.18)***  |                               | 0.12<br>(0.15)  |                        | 0.05<br>(0.11)  |                            | 0.32<br>(0.16)**  |                      | 0.14<br>(0.07)** |                  | 0.38<br>(0.19)** |

*Note:* Standard errors in parenthesis clustered at the cluster level. All regressions include the following covariates at baseline: respondent attainment of secondary education or higher (dummy); age of respondent; female (dummy); married (dummy); household size; number of children aged 0–5 years; number of children aged 6–15 years; dummies for wealth quintiles (based on wealth index); resident in urban centre ≤ 20 years (dummy); residing in Carchi Province (dummy); dependent variables at baseline.

\*  $p < .1$  \*\*  $p < .05$  \*\*\*  $p < .01$

Table SA.6. ANCOVA models of impact of transfers on measures of social cohesion (standardised indices), unadjusted

|                              | Trust in individuals |        | Agency  |           | Attitudes accepting diversity |         | Lack of discrimination |        | Confidence in institutions |         | Social participation |           | Social cohesion |          |
|------------------------------|----------------------|--------|---------|-----------|-------------------------------|---------|------------------------|--------|----------------------------|---------|----------------------|-----------|-----------------|----------|
|                              | (1)                  | (2)    | (3)     | (4)       | (5)                           | (6)     | (7)                    | (8)    | (9)                        | (10)    | (11)                 | (12)      | (13)            | (14)     |
| Pooled treatment             | 0.04                 | 0.08   | 0.16    | -0.02     | 0.10                          | 0.01    | 0.04                   | 0.05   | 0.12                       | 0.05    | 0.09                 | 0.01      | 0.15            | 0.06     |
|                              | (0.06)               | (0.08) | (0.09)* | (0.06)    | (0.07)                        | (0.06)  | (0.07)                 | (0.09) | (0.08)*                    | (0.07)  | (0.06)               | (0.08)    | (0.07)**        | (0.07)   |
| Colombian                    | -0.04                | 0.03   | -0.10   | -0.42     | 0.18                          | 0.00    | -0.22                  | -0.21  | -0.14                      | -0.27   | -0.04                | -0.18     | -0.16           | -0.33    |
|                              | (0.06)               | (0.11) | (0.06)  | (0.16)**  | (0.06)***                     | (0.12)  | (0.06)***              | (0.13) | (0.06)**                   | (0.14)* | (0.05)               | (0.08)**  | (0.06)***       | (0.14)** |
| Pooled Treatment X Colombian |                      | -0.10  |         | 0.46      |                               | 0.24    |                        | -0.02  |                            | 0.18    |                      | 0.19      |                 | 0.23     |
|                              |                      | (0.13) |         | (0.16)*** |                               | (0.14)* |                        | (0.15) |                            | (0.14)  |                      | (0.09)**  |                 | (0.15)   |
| R <sup>2</sup>               | 0.05                 | 0.06   | 0.03    | 0.05      | 0.01                          | 0.02    | 0.08                   | 0.08   | 0.05                       | 0.05    | 0.06                 | 0.06      | 0.11            | 0.11     |
| N                            | 1,878                | 1,878  | 1,878   | 1,878     | 1,878                         | 1,878   | 1,878                  | 1,878  | 1,878                      | 1,878   | 1,878                | 1,878     | 1,878           | 1,878    |
| Net treatment Colombian      |                      | -0.02  |         | 0.44      |                               | 0.25    |                        | 0.03   |                            | 0.23    |                      | 0.20      |                 | 0.29     |
|                              |                      | (0.10) |         | (0.17)**  |                               | (0.13)* |                        | (0.11) |                            | (0.13)* |                      | (0.07)*** |                 | (0.14)** |

*Note:* Standard errors in parenthesis clustered at the cluster level. Aggregate outcomes are compiled using standardised indicators. Unadjusted model with the inclusion of dependent variables at baseline and residing in Carchi Province (dummy).

\*  $p < .1$  \*\*  $p < .05$  \*\*\*  $p < .01$



Table SA.7. Background and migration characteristics, by motivation for migrating

|                                                                        | Means of characteristics |           |          | p-value of difference |                 |                 |
|------------------------------------------------------------------------|--------------------------|-----------|----------|-----------------------|-----------------|-----------------|
|                                                                        | Economic                 | Political | Personal | Col(1) – Col(2)       | Col(1) – Col(3) | Col(2) – Col(3) |
| <i>Background characteristics</i>                                      | (1)                      | (2)       | (3)      | (4)                   | (5)             | (6)             |
| Secondary education or higher                                          | 0.25                     | 0.25      | 0.25     | 0.95                  | 0.98            | 0.97            |
| Age (years)                                                            | 33.07                    | 34.24     | 34.12    | 0.37                  | 0.42            | 0.94            |
| Female                                                                 | 0.77                     | 0.84      | 0.92     | 0.12                  | 0.00            | 0.03            |
| Married                                                                | 0.16                     | 0.13      | 0.13     | 0.29                  | 0.52            | 0.92            |
| Household size                                                         | 3.66                     | 3.92      | 4.46     | 0.16                  | 0.00            | 0.06            |
| Number of children aged 0–5 years                                      | 0.68                     | 0.75      | 0.70     | 0.44                  | 0.91            | 0.59            |
| Number of children aged 6–15 years                                     | 0.85                     | 0.96      | 1.56     | 0.29                  | 0.00            | 0.00            |
| Wealth index: 2nd quintile                                             | 0.22                     | 0.26      | 0.24     | 0.43                  | 0.71            | 0.69            |
| Wealth index: 3rd quintile                                             | 0.18                     | 0.20      | 0.27     | 0.59                  | 0.09            | 0.24            |
| Wealth index: 4th quintile                                             | 0.16                     | 0.12      | 0.14     | 0.30                  | 0.73            | 0.63            |
| Wealth index: 5th quintile                                             | 0.08                     | 0.07      | 0.11     | 0.74                  | 0.40            | 0.27            |
| Carchi province                                                        | 0.44                     | 0.36      | 0.18     | 0.12                  | 0.00            | 0.00            |
| <i>Migration characteristics</i>                                       |                          |           |          |                       |                 |                 |
| Area of origin: urban                                                  | 0.25                     | 0.20      | 0.32     | 0.29                  | 0.23            | 0.03            |
| Number of times moved excluding the most recent                        | 1.59                     | 1.15      | 2.20     | 0.01                  | 0.00            | 0.00            |
| Respondent moved with entire household during the first move           | 0.38                     | 0.50      | 0.32     | 0.02                  | 0.41            | 0.01            |
| Respondent already had relatives in this urban centre when first moved | 0.41                     | 0.34      | 0.44     | 0.20                  | 0.66            | 0.11            |
| <i>Respondent or household member experienced (since first move):</i>  |                          |           |          |                       |                 |                 |

|                                               |      |      |      |      |      |      |
|-----------------------------------------------|------|------|------|------|------|------|
| Verbal threats                                | 0.24 | 0.27 | 0.37 | 0.60 | 0.04 | 0.10 |
| Verbal insults                                | 0.27 | 0.30 | 0.34 | 0.48 | 0.16 | 0.42 |
| Physically threatened with knife/gun          | 0.15 | 0.20 | 0.19 | 0.26 | 0.42 | 0.88 |
| Physically attacked with knife/gun            | 0.08 | 0.09 | 0.10 | 0.77 | 0.73 | 0.96 |
| Physically attacked/injured in other ways     | 0.08 | 0.12 | 0.08 | 0.26 | 0.78 | 0.18 |
| Kidnapped                                     | 0.02 | 0.02 | 0.07 | 0.96 | 0.07 | 0.07 |
| Obliged to do any manual work or other labour | 0.09 | 0.06 | 0.08 | 0.49 | 0.71 | 0.73 |
| Extorted for money or other goods             | 0.06 | 0.04 | 0.10 | 0.33 | 0.24 | 0.09 |
| Robbed or damaged any property                | 0.17 | 0.19 | 0.23 | 0.68 | 0.21 | 0.40 |
| Obliged to join military forces               | 0.07 | 0.09 | 0.10 | 0.52 | 0.49 | 0.87 |
| Sexual aggression                             | 0.05 | 0.09 | 0.06 | 0.13 | 0.65 | 0.24 |

---

Note: p-values are reported from Wald tests on the equality of means of treatment and control for each variable. Standard errors are clustered at the cluster level. N economic migrants = 177. N political migrants = 171. N personal reasons migrants = 105.

\*  $p < .1$  \*\*  $p < .05$  \*\*\*  $p < .01$

Table SA.8. ANCOVA models of impact of transfers on indicators of trust in individuals

|                                                        | I trust most people <sup>a</sup> |        | I can rely on my neighbour for sending mail <sup>a</sup> |        | I can rely on my neighbour to take care of my house if I am away <sup>a</sup> |        | Network size (number of people who would lend US\$10 in time of need) |         | Network size (number of people who would lend US\$100 in time of need) |        |
|--------------------------------------------------------|----------------------------------|--------|----------------------------------------------------------|--------|-------------------------------------------------------------------------------|--------|-----------------------------------------------------------------------|---------|------------------------------------------------------------------------|--------|
|                                                        | (1)                              | (2)    | (3)                                                      | (4)    | (5)                                                                           | (6)    | (7)                                                                   | (8)     | (9)                                                                    | (10)   |
| Pooled treatment                                       | 0.07                             | 0.09   | -0.01                                                    | -0.04  | -0.01                                                                         | -0.00  | 0.04                                                                  | 0.13    | 0.05                                                                   | 0.11   |
|                                                        | (0.06)                           | (0.07) | (0.06)                                                   | (0.07) | (0.06)                                                                        | (0.07) | (0.07)                                                                | (0.07)* | (0.09)                                                                 | (0.09) |
| Colombian                                              | 0.01                             | 0.05   | 0.00                                                     | -0.06  | 0.00                                                                          | 0.00   | 0.03                                                                  | 0.18    | 0.01                                                                   | 0.12   |
|                                                        | (0.06)                           | (0.10) | (0.06)                                                   | (0.10) | (0.06)                                                                        | (0.10) | (0.08)                                                                | (0.13)  | (0.09)                                                                 | (0.12) |
| Pooled treatment X Colombian                           |                                  | -0.04  |                                                          | 0.09   |                                                                               | -0.00  |                                                                       | -0.21   |                                                                        | -0.15  |
|                                                        |                                  | (0.11) |                                                          | (0.11) |                                                                               | (0.12) |                                                                       | (0.14)  |                                                                        | (0.15) |
| <i>R</i> <sup>2</sup>                                  | 0.06                             | 0.06   | 0.05                                                     | 0.05   | 0.06                                                                          | 0.06   | 0.06                                                                  | 0.07    | 0.03                                                                   | 0.03   |
| <i>N</i>                                               | 1,878                            | 1,878  | 1,878                                                    | 1,878  | 1,878                                                                         | 1,878  | 1,878                                                                 | 1,878   | 1,878                                                                  | 1,878  |
| Bonferroni-Sidak p-value: pooled treatment             | 0.72                             | 0.74   | 0.99                                                     | 0.98   | 0.99                                                                          | 0.99   | 0.98                                                                  | 0.33    | 0.99                                                                   | 0.73   |
| Bonferroni-Sidak p-value: pooled treatment X Colombian |                                  | 0.99   |                                                          | 0.93   |                                                                               | 0.99   |                                                                       | 0.54    |                                                                        | 0.87   |

*Note:* Standard errors in parenthesis clustered at the cluster level. All regressions include the following covariates at baseline: respondent attainment of secondary education or higher (dummy); age of respondent; female (dummy); married (dummy); household size; number of children aged 0–5 years; number of children aged 6–15 years; dummies for wealth quintiles (based on wealth index); resident in urban centre ≤ 20 years (dummy); residing in Carchi Province (dummy); dependent variables at baseline.

a. Values range from 1 (strongly disagree) to 4 (strongly agree).

\*  $p < .1$  \*\*  $p < .05$  \*\*\*  $p < .01$

Table SA.9. ANCOVA models of impact of transfers on indicators of agency

|                                                        | My life is determined<br>by my own actions <sup>a</sup> |          | I have the power to<br>take important<br>decisions to change<br>my life <sup>a</sup> |           | I am satisfied with<br>my life <sup>a</sup> |           | I am capable of<br>protecting my own<br>interests <sup>a</sup> |         | Overall how do you<br>feel lately? (1 = very<br>unhappy – 4=very<br>happy) |        |
|--------------------------------------------------------|---------------------------------------------------------|----------|--------------------------------------------------------------------------------------|-----------|---------------------------------------------|-----------|----------------------------------------------------------------|---------|----------------------------------------------------------------------------|--------|
|                                                        | (1)                                                     | (2)      | (3)                                                                                  | (4)       | (5)                                         | (6)       | (7)                                                            | (8)     | (9)                                                                        | (10)   |
| Pooled treatment                                       | 0.15                                                    | –0.01    | 0.13                                                                                 | –0.02     | 0.10                                        | –0.07     | 0.16                                                           | 0.04    | 0.04                                                                       | 0.04   |
|                                                        | (0.08)*                                                 | (0.06)   | (0.08)                                                                               | (0.06)    | (0.07)                                      | (0.06)    | (0.09)*                                                        | (0.06)  | (0.06)                                                                     | (0.07) |
| Colombian                                              | –0.06                                                   | –0.35    | –0.07                                                                                | –0.33     | 0.03                                        | –0.27     | –0.04                                                          | –0.25   | 0.03                                                                       | 0.03   |
|                                                        | (0.06)                                                  | (0.14)** | (0.06)                                                                               | (0.12)*** | (0.06)                                      | (0.13)**  | (0.07)                                                         | (0.16)  | (0.07)                                                                     | (0.10) |
| Pooled treatment X Colombian                           |                                                         | 0.41     |                                                                                      | 0.37      |                                             | 0.42      |                                                                | 0.29    |                                                                            | 0.01   |
|                                                        |                                                         | (0.16)** |                                                                                      | (0.13)*** |                                             | (0.14)*** |                                                                | (0.17)* |                                                                            | (0.11) |
| <i>R</i> <sup>2</sup>                                  | 0.03                                                    | 0.04     | 0.03                                                                                 | 0.04      | 0.09                                        | 0.10      | 0.04                                                           | 0.04    | 0.03                                                                       | 0.03   |
| <i>N</i>                                               | 1,878                                                   | 1,878    | 1,878                                                                                | 1,878     | 1,878                                       | 1,878     | 1,878                                                          | 1,878   | 1,878                                                                      | 1,878  |
| Bonferroni-Sidak p-value: pooled treatment             | 0.31                                                    | 0.99     | 0.46                                                                                 | 0.99      | 0.63                                        | 0.75      | 0.37                                                           | 0.96    | 0.95                                                                       | 0.98   |
| Bonferroni-Sidak p-value: pooled treatment X Colombian |                                                         | 0.05     |                                                                                      | 0.03      |                                             | 0.01      |                                                                | 0.37    |                                                                            | 0.99   |

*Note:* Standard errors in parenthesis clustered at the cluster level. All regressions include the following covariates at baseline: respondent attainment of secondary education or higher (dummy); age of respondent; female (dummy); married (dummy); household size; number of children aged 0–5 years; number of children aged 6–15 years; dummies for wealth quintiles (based on wealth index); resident in urban centre ≤ 20 years (dummy); residing in Carchi Province (dummy); dependent variables at baseline.

a. Values range from 1 (strongly disagree) to 4 (strongly agree).

\*  $p < .1$  \*\*  $p < .05$  \*\*\*  $p < .01$

Table SA.10. ANCOVA models of impact of transfers on indicators of attitudes accepting diversity

|                                                        | Cultural diversity is good |                 | Xenophobia is not an issue |                  | In my community people from different nationalities live well together |                |
|--------------------------------------------------------|----------------------------|-----------------|----------------------------|------------------|------------------------------------------------------------------------|----------------|
|                                                        | (1)                        | (2)             | (3)                        | (4)              | (5)                                                                    | (6)            |
| Pooled treatment                                       | 0.03<br>(0.08)             | -0.08<br>(0.07) | 0.08<br>(0.08)             | 0.10<br>(0.09)   | 0.08<br>(0.08)                                                         | 0.02<br>(0.07) |
| Colombian                                              | 0.04<br>(0.06)             | -0.17<br>(0.14) | 0.19<br>(0.07)***          | 0.23<br>(0.11)** | 0.13<br>(0.06)**                                                       | 0.02<br>(0.14) |
| Pooled treatment X Colombian                           |                            | 0.29<br>(0.15)* |                            | -0.05<br>(0.13)  |                                                                        | 0.15<br>(0.15) |
| $R^2$                                                  | 0.01                       | 0.02            | 0.01                       | 0.01             | 0.02                                                                   | 0.02           |
| $N$                                                    | 1,878                      | 1,878           | 1,878                      | 1,878            | 1,878                                                                  | 1,878          |
| Bonferroni-Sidak p-value: pooled treatment             | 0.97                       | 0.61            | 0.66                       | 0.57             | 0.66                                                                   | 0.98           |
| Bonferroni-Sidak p-value: pooled treatment X Colombian |                            | 0.17            |                            | 0.97             |                                                                        | 0.69           |

*Note:* Standard errors in parenthesis clustered at the cluster level. All regressions include the following covariates at baseline: respondent attainment of secondary education or higher (dummy); age of respondent; female (dummy); married (dummy); household size; number of children aged 0–5 years; number of children aged 6–15 years; dummies for wealth quintiles (based on wealth index); resident in urban centre ≤ 20 years (dummy); residing in Carchi Province (dummy); dependent variables at baseline. Values range from 1 (strongly disagree) to 4 (strongly agree).

\*  $p < .1$  \*\*  $p < .05$  \*\*\*  $p < .01$

Table SA.11. ANCOVA models of impact of transfers on indicators of freedom from discrimination, by type of discrimination

|                                                        | Ethnicity |        | Gender |        | Social condition |        | Occupation |        | Political views |        | Disability |        | Nationality |           | Religious beliefs |        | Physical appearance |        | Other reasons |         |
|--------------------------------------------------------|-----------|--------|--------|--------|------------------|--------|------------|--------|-----------------|--------|------------|--------|-------------|-----------|-------------------|--------|---------------------|--------|---------------|---------|
|                                                        | (1)       | (2)    | (3)    | (4)    | (5)              | (6)    | (7)        | (8)    | (9)             | (10)   | (11)       | (12)   | (13)        | (14)      | (15)              | (16)   | (17)                | (18)   | (19)          | (20)    |
| Pooled treatment                                       | -0.07     | -0.02  | 0.02   | 0.02   | 0.06             | 0.03   | 0.10       | 0.10   | 0.04            | 0.07   | 0.07       | 0.04   | 0.02        | 0.02      | 0.07              | 0.09   | -0.01               | 0.01   | -0.09         | -0.12   |
|                                                        | (0.05)    | (0.06) | (0.07) | (0.09) | (0.07)           | (0.08) | (0.07)     | (0.09) | (0.05)          | (0.07) | (0.06)     | (0.07) | (0.05)      | (0.05)    | (0.05)            | (0.07) | (0.08)              | (0.12) | (0.06)        | (0.06)* |
| Colombian                                              | -0.10     | -0.02  | 0.04   | 0.03   | -0.04            | -0.10  | -0.04      | -0.04  | -0.00           | 0.04   | -0.05      | -0.10  | -0.43       | -0.42     | -0.04             | -0.01  | -0.11               | -0.07  | -0.14         | -0.18   |
|                                                        | (0.07)    | (0.11) | (0.06) | (0.11) | (0.06)           | (0.10) | (0.07)     | (0.12) | (0.05)          | (0.09) | (0.06)     | (0.14) | (0.07)***   | (0.11)*** | (0.06)            | (0.11) | (0.08)              | (0.17) | (0.08)*       | (0.11)  |
| Pooled treatment X Colombian                           |           | -0.12  |        | 0.01   |                  | 0.08   |            | -0.00  |                 | -0.06  |            | 0.08   |             | -0.02     |                   | -0.05  |                     | -0.05  |               | 0.07    |
|                                                        |           | (0.12) |        | (0.11) |                  | (0.12) |            | (0.13) |                 | (0.10) |            | (0.15) |             | (0.12)    |                   | (0.11) |                     | (0.16) |               | (0.13)  |
| R <sup>2</sup>                                         | 0.05      | 0.05   | 0.03   | 0.03   | 0.07             | 0.07   | 0.06       | 0.06   | 0.04            | 0.04   | 0.07       | 0.07   | 0.19        | 0.19      | 0.07              | 0.07   | 0.03                | 0.03   | 0.01          | 0.01    |
| N                                                      | 1,878     | 1,878  | 1,878  | 1,878  | 1,878            | 1,878  | 1,878      | 1,878  | 1,878           | 1,878  | 1,878      | 1,878  | 1,878       | 1,878     | 1,878             | 1,878  | 1,878               | 1,878  | 1,878         | 1,878   |
| Bonferroni-Sidak p-value: tooled treatment             | 0.83      | 0.99   | 0.99   | 0.99   | 0.99             | 0.99   | 0.78       | 0.95   | 0.99            | 0.98   | 0.95       | 0.99   | 0.99        | 0.99      | 0.86              | 0.91   | 0.99                | 0.99   | 0.76          | 0.45    |
| Bonferroni-Sidak p-value: pooled treatment X Colombian |           | 0.97   |        | 0.99   |                  | 0.99   |            | 0.99   |                 | 0.99   |            | 0.99   |             | 0.99      |                   | 0.99   |                     | 0.99   |               | 0.99    |

*Note:* Standard errors in parenthesis clustered at the cluster level. All regressions include the following covariates at baseline: respondent attainment of secondary education or higher (dummy); age of respondent; female (dummy); married (dummy); household size; number of children aged 0–5 years; number of children aged 6–15 years; dummies for wealth quintiles (based on wealth index); resident in urban centre ≤ 20 years (dummy); residing in Carchi Province (dummy); dependent variables at baseline. Indicators equal to 1 if respondent did not experience discrimination episode and 0 otherwise.

\*  $p < .1$  \*\*  $p < .05$  \*\*\*  $p < .01$

Table SA.12. ANCOVA models of impact of transfers on indicators of confidence in institutions

|                                                        | The government would help my family in an emergency |         | Politicians represent my interests |        | If I am victim of a crime I can go to the police to get help |         | I have the space to participate in the decisions of my community |         | I have the right to social basic assistance |        | I feel part of the community |         |
|--------------------------------------------------------|-----------------------------------------------------|---------|------------------------------------|--------|--------------------------------------------------------------|---------|------------------------------------------------------------------|---------|---------------------------------------------|--------|------------------------------|---------|
|                                                        | (1)                                                 | (2)     | (3)                                | (4)    | (5)                                                          | (6)     | (7)                                                              | (8)     | (9)                                         | (10)   | (11)                         | (12)    |
| Pooled treatment                                       | 0.11                                                | 0.03    | -0.09                              | -0.07  | 0.16                                                         | 0.12    | 0.12                                                             | 0.06    | 0.12                                        | 0.07   | 0.13                         | 0.04    |
|                                                        | (0.06)*                                             | (0.07)  | (0.07)                             | (0.10) | (0.06)**                                                     | (0.06)* | (0.07)*                                                          | (0.07)  | (0.08)                                      | (0.07) | (0.08)                       | (0.06)  |
| Colombian                                              | -0.03                                               | -0.16   | -0.08                              | -0.06  | -0.02                                                        | -0.09   | -0.13                                                            | -0.23   | -0.13                                       | -0.22  | -0.07                        | -0.24   |
|                                                        | (0.06)                                              | (0.10)  | (0.07)                             | (0.12) | (0.06)                                                       | (0.12)  | (0.06)**                                                         | (0.12)* | (0.07)*                                     | (0.14) | (0.06)                       | (0.14)* |
| Pooled treatment X Colombian                           |                                                     | 0.19    |                                    | -0.03  |                                                              | 0.09    |                                                                  | 0.15    |                                             | 0.13   |                              | 0.24    |
|                                                        |                                                     | (0.11)* |                                    | (0.13) |                                                              | (0.13)  |                                                                  | (0.14)  |                                             | (0.15) |                              | (0.15)  |
| $R^2$                                                  | 0.05                                                | 0.05    | 0.02                               | 0.02   | 0.04                                                         | 0.04    | 0.07                                                             | 0.07    | 0.06                                        | 0.06   | 0.03                         | 0.03    |
| $N$                                                    | 1,878                                               | 1,878   | 1,878                              | 1,878  | 1,878                                                        | 1,878   | 1,878                                                            | 1,878   | 1,878                                       | 1,878  | 1,878                        | 1,878   |
| Bonferroni-Sidak p-value: pooled treatment             | 0.34                                                | 0.99    | 0.81                               | 0.97   | 0.09                                                         | 0.32    | 0.43                                                             | 0.95    | 0.49                                        | 0.89   | 0.50                         | 0.99    |
| Bonferroni-Sidak p-value: pooled treatment X Colombian |                                                     | 0.45    |                                    | 0.99   |                                                              | 0.98    |                                                                  | 0.86    |                                             | 0.94   |                              | 0.53    |

*Note:* Standard errors in parenthesis clustered at the cluster level. All regressions include the following covariates at baseline: respondent attainment of secondary education or higher (dummy); age of respondent; female (dummy); married (dummy); household size; number of children aged 0–5 years; number of children aged 6–15 years; dummies for wealth quintiles (based on wealth index); resident in urban centre ≤ 20 years (dummy); residing in Carchi Province (dummy); dependent variables at baseline. Values range from 1 (strongly disagree) to 4 (strongly agree).

\*  $p < .1$  \*\*  $p < .05$  \*\*\*  $p < .01$

Table SA.13. ANCOVA models of impact of transfers on indicators of social participation

|                                                        | Participation in agricultural association or union |                  | Participation in religious or spiritual group |                 | Participation in community association or political group |                 | Participation in other groups (NGOs cultural) |                   |
|--------------------------------------------------------|----------------------------------------------------|------------------|-----------------------------------------------|-----------------|-----------------------------------------------------------|-----------------|-----------------------------------------------|-------------------|
|                                                        | (1)                                                | (2)              | (3)                                           | (4)             | (5)                                                       | (6)             | (7)                                           | (8)               |
| Pooled treatment                                       | -0.09<br>(0.06)                                    | -0.13<br>(0.07)* | -0.03<br>(0.06)                               | -0.08<br>(0.08) | -0.04<br>(0.07)                                           | -0.05<br>(0.09) | 0.41<br>(0.09)***                             | 0.31<br>(0.11)*** |
| Colombian                                              | -0.03<br>(0.05)                                    | -0.10<br>(0.10)  | 0.00<br>(0.06)                                | -0.10<br>(0.10) | 0.01<br>(0.05)                                            | 0.00<br>(0.10)  | 0.02<br>(0.09)                                | -0.17<br>(0.11)   |
| Pooled treatment X Colombian                           |                                                    | 0.10<br>(0.10)   |                                               | 0.15<br>(0.12)  |                                                           | 0.01<br>(0.11)  |                                               | 0.27<br>(0.14)*   |
| $R^2$                                                  | 0.07                                               | 0.07             | 0.09                                          | 0.09            | 0.05                                                      | 0.05            | 0.04                                          | 0.04              |
| $N$                                                    | 1,878                                              | 1,878            | 1,878                                         | 1,878           | 1,878                                                     | 1,878           | 1,878                                         | 1,878             |
| Bonferroni-Sidak p-value: pooled treatment             | 0.38                                               | 0.28             | 0.99                                          | 0.79            | 0.96                                                      | 0.98            | 0.00                                          | 0.03              |
| Bonferroni-Sidak p-value: pooled treatment X Colombian |                                                    | 0.82             |                                               | 0.62            |                                                           | 0.99            |                                               | 0.19              |

*Note:* Standard errors in parenthesis clustered at the cluster level. All regressions include the following covariates at baseline: respondent attainment of secondary education or higher (dummy); age of respondent; female (dummy); married (dummy); household size; number of children aged 0–5 years; number of children aged 6–15 years; dummies for wealth quintiles (based on wealth index); resident in urban centre ≤ 20 years (dummy); residing in Carchi Province (dummy); dependent variables at baseline. Indicators equal to 1 if respondent did not experience discrimination episode and 0 otherwise.

\*  $p < .1$  \*\*  $p < .05$  \*\*\*  $p < .01$
